# Supplementary figures and images for: Optimal Heart Rate and Prognosis in Patients with Cardiac Amyloidosis
Source: MDPI journal article supplement (doi:10.3390/jcdd8120182), 2021-12-12

supplementary materials

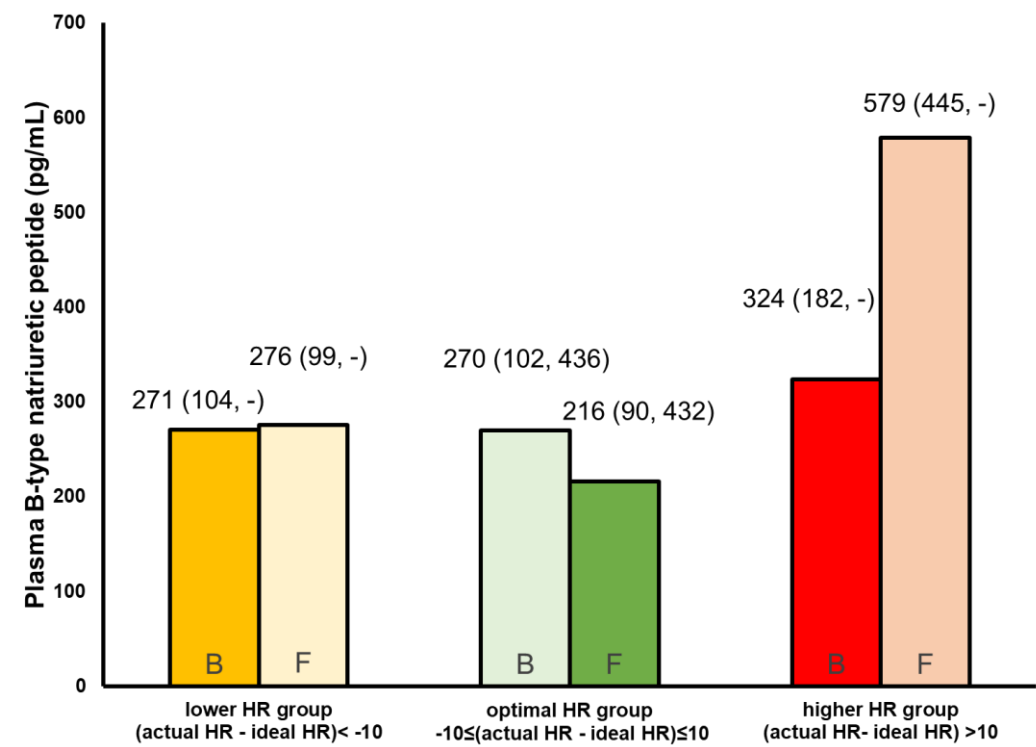

Figure S1

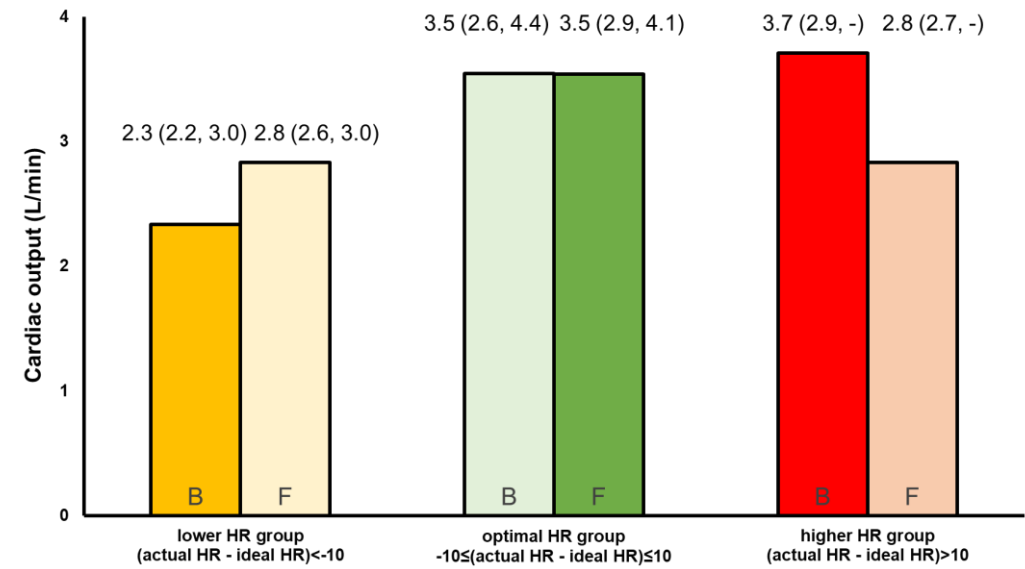

Figure S2

Supplement: s1 [file s1]
